# Supplementary material
Source: Springer Nature journal article supplement (https://www.springermedizin.de/resource/supplementary/12883_2013_873_MOESM1_ESM.pdf/9456016)
Supplement: MOESM1 [file 9456016]

$$\text{Equation 1: PDC} = \frac{\text{Total prescription days of supply} - \max\{0, [\text{estimated next prescription date} - \text{end of fixed interval}]\}}{\text{Duration of fixed interval}}$$

$$\text{Equation 2: MPR} = \frac{\text{Total prescription days of supply} - \text{Last prescription days of supply} - \max\{0, [\text{estimated last prescription fill date} - \text{actual last prescription fill date}]\}}{(\text{Last prescription fill date} - \text{First prescription fill date})}$$
